# Supplementary material for: ﻿Sinocyclocheiluslongicornus (Cypriniformes, Cyprinidae), a new species of microphthalmic hypogean fish from Guizhou, Southwest China
Source: Zookeys. 2023 Jan 17;1141:1–28. doi: 10.3897/zookeys.1141.91501 (PMC10208810; doi:10.3897/zookeys.1141.91501)
Supplement: Supplementary material 2 — Uncorrected p-distance (%) between 53 species of the genus Sinocyclocheilus based on mitochondrial Cyt b sequences [file zookeys-1141-001_article-91501__-s002.xlsx]

## Sheet: Cytb
ID	Species	1	2	3	4	5	6	7	8	9	10	11	12	13	14	15	16	17	18	19	20	21	22	23	24	25	26	27	28	29	30	31	32	33	34	35	36	37	38	39	40	41	42	43	44	45	46	47	48
1	Sinocyclocheilus longihornes sp. nov.
2	Sinocyclocheilus altishoulderus	0.0608175
3	Sinocyclocheilus anatirostris	0.113659	0.112662
4	Sinocyclocheilus angularis	0.0628116	0.0239282	0.109671
5	Sinocyclocheilus angustiporus	0.112662	0.107677	0.132602	0.10668
6	Sinocyclocheilus anophthalmus	0.127617	0.122632	0.145563	0.117647	0.0877368
7	Sinocyclocheilus anshuiensis	0.118644	0.131605	0.124626	0.119641	0.122632	0.135593
8	Sinocyclocheilus bicornutus	0.0598205	0.0319043	0.108674	0.0319043	0.112662	0.129611	0.130608
9	Sinocyclocheilus brevibarbatus	0.0648056	0.00598205	0.11665	0.0259222	0.113659	0.124626	0.133599	0.0338983
10	Sinocyclocheilus brevis	0.100698	0.0977069	0.115653	0.0947159	0.0947159	0.11665	0.117647	0.100698	0.103689
11	Sinocyclocheilus cyphotergous	0.122632	0.111665	0.134596	0.117647	0.119641	0.122632	0.139581	0.11665	0.117647	0.100698
12	Sinocyclocheilus donglanensis	0.10668	0.0997009	0.120638	0.0927218	0.0977069	0.120638	0.12662	0.100698	0.101695	0.0279163	0.104686
13	Sinocyclocheilus furcodorsalis	0.0977069	0.0917248	0.0249252	0.0887338	0.133599	0.143569	0.130608	0.0907278	0.0937188	0.117647	0.129611	0.120638
14	Sinocyclocheilus grahami	0.122632	0.125623	0.139581	0.11665	0.0857428	0.0588235	0.134596	0.122632	0.127617	0.117647	0.114656	0.113659	0.13659
15	Sinocyclocheilus guanyangensis	0.131605	0.120638	0.150548	0.124626	0.122632	0.138584	0.151545	0.125623	0.12662	0.119641	0.133599	0.121635	0.14656	0.140578
16	Sinocyclocheilus guilinensis	0.12662	0.112662	0.149551	0.11665	0.127617	0.122632	0.160518	0.123629	0.114656	0.123629	0.134596	0.127617	0.142572	0.135593	0.0787637
17	Sinocyclocheilus guishanensis	0.107677	0.10668	0.130608	0.105683	0.0608175	0.0887338	0.132602	0.109671	0.110668	0.103689	0.111665	0.102692	0.122632	0.0797607	0.125623	0.134596
18	Sinocyclocheilus huangtianensis	0.131605	0.121635	0.143569	0.125623	0.11665	0.131605	0.151545	0.122632	0.127617	0.11665	0.128614	0.120638	0.137587	0.137587	0.0219342	0.0757727	0.125623
19	Sinocyclocheilus huaningensis	0.10668	0.103689	0.129611	0.10668	0.0528415	0.0887338	0.128614	0.109671	0.107677	0.0997009	0.112662	0.100698	0.124626	0.0807577	0.12662	0.132602	0.0269192	0.125623
20	Sinocyclocheilus huanjiangensis	0.102692	0.0997009	0.117647	0.0967099	0.0947159	0.11665	0.119641	0.102692	0.105683	0.00398804	0.100698	0.0279163	0.119641	0.115653	0.121635	0.125623	0.103689	0.114656	0.0997009
21	Sinocyclocheilus hugeibarbus	0.107677	0.100698	0.123629	0.0937188	0.0967099	0.117647	0.127617	0.101695	0.102692	0.0289133	0.107677	0.00299103	0.123629	0.112662	0.122632	0.12662	0.101695	0.121635	0.0997009	0.0289133
22	Sinocyclocheilus huizeensis	0.11665	0.12662	0.140578	0.113659	0.0837488	0.0628116	0.135593	0.122632	0.128614	0.120638	0.112662	0.11665	0.138584	0.0239282	0.137587	0.133599	0.0807577	0.133599	0.0857428	0.118644	0.115653
23	Sinocyclocheilus hyalinus	0.0677966	0.0707876	0.113659	0.0677966	0.11665	0.118644	0.130608	0.0747757	0.0747757	0.10668	0.117647	0.105683	0.100698	0.113659	0.115653	0.121635	0.108674	0.119641	0.107677	0.10668	0.108674	0.108674
24	Sinocyclocheilus jii	0.131605	0.120638	0.150548	0.124626	0.122632	0.138584	0.151545	0.125623	0.12662	0.119641	0.133599	0.121635	0.14656	0.140578	0	0.0787637	0.125623	0.0219342	0.12662	0.121635	0.122632	0.137587	0.115653
25	Sinocyclocheilus jiuxuensis	0.0638086	0.00697906	0.113659	0.0209372	0.108674	0.121635	0.130608	0.0309073	0.00897308	0.0977069	0.109671	0.0957129	0.0907278	0.120638	0.119641	0.111665	0.107677	0.120638	0.104686	0.0997009	0.0967099	0.123629	0.0697906	0.119641
26	Sinocyclocheilus lateristriatus	0.115653	0.102692	0.124626	0.108674	0.0727817	0.0897308	0.129611	0.107677	0.108674	0.10668	0.113659	0.103689	0.119641	0.0807577	0.130608	0.134596	0.0578265	0.129611	0.0588235	0.10668	0.10668	0.0837488	0.108674	0.130608	0.105683
27	Sinocyclocheilus lingyunensis	0.108674	0.102692	0.122632	0.0957129	0.0997009	0.122632	0.122632	0.103689	0.104686	0.0299103	0.10668	0.00398804	0.122632	0.115653	0.125623	0.127617	0.102692	0.124626	0.100698	0.0299103	0.00697906	0.118644	0.107677	0.125623	0.0987039	0.105683
28	Sinocyclocheilus longibarbatus	0.10668	0.0977069	0.115653	0.0947159	0.0947159	0.107677	0.117647	0.104686	0.103689	0.0139581	0.0937188	0.0309073	0.117647	0.115653	0.119641	0.122632	0.103689	0.114656	0.0997009	0.0139581	0.0319043	0.117647	0.108674	0.119641	0.0977069	0.10668	0.0329013
29	Sinocyclocheilus macrocephalus	0.107677	0.102692	0.130608	0.105683	0.0558325	0.0887338	0.128614	0.109671	0.108674	0.0997009	0.109671	0.101695	0.125623	0.0807577	0.124626	0.132602	0.0249252	0.119641	0.0179462	0.0997009	0.100698	0.0817547	0.10668	0.124626	0.103689	0.0548355	0.101695	0.100698
30	Sinocyclocheilus macrolepis	0.121635	0.114656	0.139581	0.117647	0.119641	0.122632	0.144566	0.11665	0.118644	0.104686	0.115653	0.109671	0.137587	0.130608	0.137587	0.142572	0.105683	0.134596	0.105683	0.10668	0.110668	0.131605	0.130608	0.137587	0.111665	0.121635	0.111665	0.101695	0.105683
31	Sinocyclocheilus macrophthalmus	0.107677	0.101695	0.118644	0.0967099	0.105683	0.120638	0.127617	0.102692	0.103689	0.0388833	0.107677	0.0199402	0.11665	0.113659	0.121635	0.120638	0.102692	0.120638	0.101695	0.0388833	0.0229312	0.115653	0.0997009	0.121635	0.0987039	0.103689	0.0239282	0.0408774	0.104686	0.109671
32	Sinocyclocheilus maculatus	0.131605	0.123629	0.149551	0.120638	0.0927218	0.00697906	0.13659	0.132602	0.125623	0.121635	0.125623	0.123629	0.144566	0.0638086	0.142572	0.122632	0.0937188	0.135593	0.0917248	0.121635	0.120638	0.0677966	0.124626	0.142572	0.122632	0.0947159	0.125623	0.112662	0.0937188	0.12662	0.123629
33	Sinocyclocheilus maitianheensis	0.127617	0.122632	0.145563	0.117647	0.0877368	0.00199402	0.133599	0.129611	0.124626	0.11665	0.122632	0.120638	0.143569	0.0588235	0.138584	0.122632	0.0867398	0.131605	0.0867398	0.11665	0.117647	0.0628116	0.119641	0.138584	0.121635	0.0897308	0.120638	0.107677	0.0867398	0.120638	0.120638	0.00697906
34	Sinocyclocheilus malacopterus	0.103689	0.100698	0.125623	0.101695	0.0538385	0.0807577	0.123629	0.107677	0.10668	0.101695	0.113659	0.102692	0.120638	0.0737787	0.12662	0.124626	0.0209372	0.123629	0.0319043	0.0997009	0.101695	0.0737787	0.102692	0.12662	0.103689	0.0488534	0.102692	0.0977069	0.0279163	0.108674	0.102692	0.0857428	0.0787637
35	Sinocyclocheilus mashanensis	0.0618146	0.000997009	0.113659	0.0229312	0.108674	0.123629	0.132602	0.0329013	0.00697906	0.0987039	0.112662	0.100698	0.0927218	0.12662	0.119641	0.111665	0.107677	0.120638	0.104686	0.100698	0.101695	0.127617	0.0697906	0.119641	0.00797607	0.103689	0.103689	0.0987039	0.103689	0.115653	0.102692	0.124626	0.123629	0.101695
36	Sinocyclocheilus microphthalmus	0.113659	0.110668	0.112662	0.0987039	0.120638	0.123629	0.107677	0.112662	0.110668	0.102692	0.131605	0.102692	0.113659	0.130608	0.137587	0.137587	0.120638	0.13659	0.124626	0.104686	0.105683	0.12662	0.10668	0.137587	0.111665	0.123629	0.104686	0.103689	0.120638	0.141575	0.103689	0.12662	0.123629	0.120638	0.109671
37	Sinocyclocheilus multipunctatus	0.124626	0.111665	0.137587	0.117647	0.117647	0.121635	0.13659	0.114656	0.115653	0.101695	0.00897308	0.103689	0.132602	0.114656	0.135593	0.13659	0.109671	0.130608	0.110668	0.101695	0.10668	0.114656	0.117647	0.135593	0.107677	0.113659	0.105683	0.0947159	0.109671	0.115653	0.108674	0.124626	0.121635	0.111665	0.112662	0.132602
38	Sinocyclocheilus oxycephalus	0.105683	0.104686	0.130608	0.103689	0.0588235	0.0887338	0.130608	0.107677	0.108674	0.0987039	0.108674	0.0937188	0.123629	0.0787637	0.127617	0.135593	0.0269192	0.124626	0.0219342	0.0987039	0.0927218	0.0797607	0.10668	0.127617	0.103689	0.0588235	0.0937188	0.0987039	0.0239282	0.105683	0.0947159	0.0917248	0.0867398	0.0319043	0.105683	0.11665	0.108674
39	Sinocyclocheilus punctatus	0.118644	0.109671	0.140578	0.111665	0.115653	0.117647	0.139581	0.114656	0.111665	0.0987039	0.0269192	0.0987039	0.133599	0.112662	0.135593	0.137587	0.105683	0.134596	0.108674	0.102692	0.101695	0.114656	0.117647	0.135593	0.103689	0.110668	0.102692	0.0957129	0.109671	0.11665	0.104686	0.120638	0.117647	0.109671	0.110668	0.125623	0.0219342	0.104686
40	Sinocyclocheilus purpureus	0.107677	0.10668	0.128614	0.109671	0.0508475	0.0817547	0.129611	0.111665	0.112662	0.0987039	0.111665	0.0977069	0.127617	0.0757727	0.12662	0.129611	0.0368893	0.125623	0.0319043	0.0987039	0.0967099	0.0747757	0.107677	0.12662	0.109671	0.0538385	0.0997009	0.0987039	0.0309073	0.115653	0.0997009	0.0847458	0.0817547	0.0319043	0.107677	0.119641	0.109671	0.0368893	0.111665
41	Sinocyclocheilus qiubeiensis	0.117647	0.127617	0.139581	0.114656	0.0847458	0.0638086	0.13659	0.123629	0.129611	0.121635	0.113659	0.117647	0.137587	0.0249252	0.138584	0.134596	0.0817547	0.134596	0.0867398	0.119641	0.11665	0.000997009	0.109671	0.138584	0.124626	0.0847458	0.119641	0.118644	0.0827517	0.132602	0.11665	0.0687936	0.0638086	0.0747757	0.128614	0.127617	0.115653	0.0807577	0.115653	0.0757727
42	Sinocyclocheilus qujingensis	0.114656	0.109671	0.128614	0.111665	0.0687936	0.0807577	0.131605	0.112662	0.115653	0.100698	0.115653	0.10668	0.125623	0.0717846	0.122632	0.127617	0.0528415	0.122632	0.0558325	0.102692	0.105683	0.0757727	0.109671	0.122632	0.110668	0.0319043	0.108674	0.104686	0.0498504	0.113659	0.108674	0.0857428	0.0807577	0.0428714	0.110668	0.122632	0.115653	0.0538385	0.111665	0.0508475	0.0767697
43	Sinocyclocheilus rhinocerous	0.0598205	0.0588235	0.114656	0.0578265	0.119641	0.121635	0.130608	0.0658026	0.0628116	0.105683	0.124626	0.10668	0.0997009	0.115653	0.129611	0.130608	0.113659	0.130608	0.114656	0.107677	0.109671	0.114656	0.0588235	0.129611	0.0598205	0.104686	0.110668	0.107677	0.113659	0.131605	0.104686	0.125623	0.121635	0.107677	0.0598205	0.109671	0.124626	0.113659	0.119641	0.111665	0.115653	0.103689
44	Sinocyclocheilus ronganensis	0.100698	0.0997009	0.119641	0.100698	0.110668	0.122632	0.124626	0.101695	0.105683	0.0927218	0.111665	0.0897308	0.120638	0.131605	0.133599	0.138584	0.10668	0.130608	0.107677	0.0947159	0.0927218	0.130608	0.121635	0.133599	0.103689	0.113659	0.0917248	0.0967099	0.105683	0.102692	0.0937188	0.125623	0.120638	0.107677	0.100698	0.107677	0.113659	0.102692	0.115653	0.107677	0.131605	0.114656	0.111665
45	Sinocyclocheilus sanxiaensis	0.128614	0.113659	0.137587	0.119641	0.121635	0.127617	0.141575	0.118644	0.117647	0.10668	0.0149551	0.108674	0.132602	0.118644	0.139581	0.140578	0.115653	0.134596	0.11665	0.10668	0.111665	0.118644	0.122632	0.139581	0.109671	0.117647	0.110668	0.0997009	0.113659	0.120638	0.113659	0.130608	0.127617	0.115653	0.114656	0.132602	0.00897308	0.113659	0.0269192	0.113659	0.119641	0.119641	0.128614	0.115653
46	Sinocyclocheilus tianlinensis	0.112662	0.111665	0.00299103	0.108674	0.129611	0.144566	0.123629	0.107677	0.115653	0.11665	0.135593	0.121635	0.0279163	0.138584	0.151545	0.14656	0.127617	0.144566	0.12662	0.118644	0.122632	0.139581	0.114656	0.151545	0.112662	0.123629	0.121635	0.11665	0.127617	0.138584	0.119641	0.148554	0.144566	0.122632	0.112662	0.113659	0.138584	0.127617	0.141575	0.127617	0.138584	0.125623	0.115653	0.120638	0.138584
47	Sinocyclocheilus tingi	0.131605	0.135593	0.147557	0.12662	0.0927218	0.0727817	0.147557	0.132602	0.137587	0.121635	0.128614	0.119641	0.149551	0.0358923	0.147557	0.147557	0.0917248	0.142572	0.0947159	0.119641	0.118644	0.0358923	0.123629	0.147557	0.130608	0.0927218	0.121635	0.119641	0.0947159	0.133599	0.123629	0.0777667	0.0727817	0.0847458	0.13659	0.138584	0.124626	0.0887338	0.121635	0.0897308	0.0368893	0.0847458	0.125623	0.13659	0.127617	0.148554
48	Sinocyclocheilus wumengshanensis	0.118644	0.120638	0.127617	0.115653	0.0757727	0.0598205	0.133599	0.119641	0.124626	0.109671	0.114656	0.111665	0.129611	0.0358923	0.130608	0.131605	0.0747757	0.127617	0.0737787	0.111665	0.108674	0.0378863	0.111665	0.130608	0.119641	0.0737787	0.113659	0.111665	0.0717846	0.122632	0.111665	0.0648056	0.0598205	0.0697906	0.121635	0.123629	0.113659	0.0717846	0.115653	0.0648056	0.0388833	0.0658026	0.115653	0.123629	0.117647	0.12662	0.0528415
49	Sinocyclocheilus xunlensis	0.103689	0.0967099	0.11665	0.0957129	0.0977069	0.11665	0.122632	0.101695	0.102692	0.0109671	0.101695	0.0299103	0.118644	0.118644	0.123629	0.123629	0.10668	0.118644	0.102692	0.0109671	0.0309073	0.121635	0.107677	0.123629	0.0987039	0.107677	0.0319043	0.0109671	0.103689	0.10668	0.0398804	0.121635	0.11665	0.102692	0.0977069	0.104686	0.102692	0.101695	0.101695	0.101695	0.122632	0.105683	0.10668	0.0947159	0.107677	0.117647	0.122632	0.112662
50	Sinocyclocheilus yangzongensis	0.117647	0.111665	0.132602	0.114656	0.0777667	0.0947159	0.129611	0.114656	0.117647	0.107677	0.109671	0.109671	0.132602	0.100698	0.134596	0.143569	0.0757727	0.133599	0.0797607	0.107677	0.108674	0.0977069	0.115653	0.134596	0.112662	0.0857428	0.111665	0.103689	0.0737787	0.113659	0.117647	0.0947159	0.0947159	0.0687936	0.112662	0.129611	0.107677	0.0777667	0.109671	0.0707876	0.0987039	0.0847458	0.130608	0.117647	0.109671	0.131605	0.104686	0.0917248
51	Sinocyclocheilus yimenensis	0.120638	0.125623	0.143569	0.114656	0.0857428	0.0638086	0.138584	0.123629	0.127617	0.119641	0.11665	0.115653	0.141575	0.0269192	0.138584	0.13659	0.0807577	0.134596	0.0857428	0.117647	0.114656	0.0169492	0.110668	0.138584	0.122632	0.0837488	0.117647	0.117647	0.0817547	0.131605	0.11665	0.0667996	0.0638086	0.0737787	0.124626	0.130608	0.11665	0.0817547	0.11665	0.0747757	0.0179462	0.0727817	0.115653	0.130608	0.120638	0.142572	0.0368893	0.0398804
52	Sinocyclocheilus yishanensis	0.11665	0.108674	0.121635	0.102692	0.111665	0.125623	0.127617	0.108674	0.110668	0.0498504	0.112662	0.0418744	0.121635	0.124626	0.129611	0.124626	0.109671	0.12662	0.111665	0.0518445	0.0428714	0.12662	0.11665	0.129611	0.10668	0.108674	0.0438684	0.0558325	0.110668	0.117647	0.0478564	0.128614	0.125623	0.110668	0.109671	0.107677	0.113659	0.104686	0.110668	0.104686	0.127617	0.111665	0.114656	0.101695	0.11665	0.122632	0.134596	0.118644
53	Sinocyclocheilus zhenfengensis	0.0667996	0.0299103	0.107677	0.0279163	0.111665	0.122632	0.127617	0.0319043	0.0319043	0.0997009	0.112662	0.0977069	0.0887338	0.119641	0.132602	0.12662	0.110668	0.127617	0.111665	0.0997009	0.0987039	0.118644	0.0717846	0.132602	0.0269192	0.10668	0.100698	0.0977069	0.110668	0.114656	0.0997009	0.125623	0.122632	0.104686	0.0309073	0.109671	0.110668	0.108674	0.110668	0.114656	0.119641	0.111665	0.0677966	0.105683	0.114656	0.10668	0.12662	0.118644
[truncated: 5 more columns]
